# Supplementary material
Source: publisher figshare collection journal article supplement (https://gsajournals.figshare.com/ndownloader/files/22264923)
Supplement: Supplementary file 1 [file 22264923]

Table S5: Trait effects for different populations in the sun condition, estimated from the path models.
Population	RB ~ BD	IG ~ BD	IG ~ RB	IB ~ BD	IB ~ RB	IB ~ IG
Blh-1	0.425859275	-0.360850679	0.715636872	-0.022451275	0.068940544	0.073514635
Bur-0	0.109733165		-0.389283178		0.195539253	0.242686336
Cvi-0	0.644710789		0.216070703		0.171995447	0.135037134
Ita-0	0.557018843	-0.219681354	0.198066138		0.197206227	0.165246461
Jea	0.199273154	-0.207779779	0.464014024		0.214673281	0.099470526
Oy-0	0.10236612		3.474145233		0.335472315	0.021974029
Sha	0.734902249				0.036762339	0.148344085
NA: Path coefficients were not significant and so dropped from the final model.
